# Supplementary material
Source: publisher figshare collection journal article supplement (https://frontiersin.figshare.com/ndownloader/files/13381721)
Supplement: Supplementary file [file 13381721]

**Table S1.** Robustness Check 1: Including *own attitude towards Turks* as an additional control in the multi-level path model with national self-identification as the final dependent variable and while controlling for students nested in school classes

| Effects on national self-identification | $\beta$              | CI                 |
|-----------------------------------------|----------------------|--------------------|
| Perceived national fit (separated)      | 0.072 * <sup>a</sup> | [0.008; 0.136]     |
| Perceived national fit (integrated)     | 0.072 * <sup>a</sup> | [0.011; 0.133]     |
| Perceived national fit (assimilated)    | - 0.029 ^            | [- 0.087; 0.029]   |
| Own attitude towards maintenance        | - 0.085 **           | [- 0.144; - 0.027] |
| Own attitude towards adoption           | 0.222 ***            | [0.163; 0.282]     |
| Own attitude towards Turks              | - 0.072 *            | [- 0.142; - 0.002] |
| Girls                                   | 0.107 ***            | [0.049; 0.165]     |
| Turkish                                 | 0.120 ***            | [0.055; 0.186]     |

  

| Effects on perceived national fit  | separated   |                    | integrated            |                    | assimilated            |                    |
|------------------------------------|-------------|--------------------|-----------------------|--------------------|------------------------|--------------------|
|                                    | $\beta$     | CI                 | $\beta$               | CI                 | $\beta$                | CI                 |
| Perceived acceptance (separated)   | 0.471 ***   | [0.420; 0.521]     | 0.074 *               | [0.012; 0.136]     | - 0.056                | [- 0.116; 0.004]   |
| Perceived acceptance (integrated)  | 0.025       | [- 0.034; 0.084]   | 0.360*** <sup>b</sup> | [0.297; 0.424]     | - 0.009                | [- 0.072; 0.054]   |
| Perceived acceptance (assimilated) | - 0.125 *** | [- 0.179; - 0.071] | - 0.085 **            | [- 0.140; - 0.031] | 0.318 *** <sup>b</sup> | [0.261; 0.375]     |
| Own attitude towards Turks         | - 0.031     | [- 0.100; 0.038]   | - 0.026               | [- 0.097; 0.045]   | 0.003                  | [- 0.070; 0.076]   |
| Girls                              | - 0.073 **  | [- 0.122; - 0.023] | - 0.066 **            | [- 0.114; - 0.018] | - 0.071 **             | [- 0.124; - 0.018] |
| Turkish                            | - 0.027     | [- 0.079; 0.025]   | - 0.026               | [- 0.080; 0.029]   | 0.033                  | [- 0.023; 0.089]   |

  

| Explained Variances ( $R^2$ )      |       |
|------------------------------------|-------|
| National self-identification       | 0.098 |
| Perceived national fit (separated) | 0.253 |

|                                      |       |
|--------------------------------------|-------|
| Perceived national fit (integrated)  | 0.156 |
| Perceived national fit (assimilated) | 0.109 |

---

*Notes.* Standardized regression coefficients ( $\beta$ ) with 95% confidence intervals (CI) are reported. Identical superscripts indicate effects that did not significantly differ. \*\*\*  $p < 0.001$ , \*\*  $p < 0.01$ , \*  $p < 0.05$ , ^  $p = 0.329$
